# Supplementary material for: Adult IDH Wild-Type Glioblastoma Ultrastructural Investigation Suggests a Possible Correlation between Morphological Biomarkers and Ki-67 Index
Source: MDPI journal article supplement (doi:10.3390/biomedicines11071968), 2023-07-12
Supplement: s1 [file s1]

**Supplementary Materials:**

**Table S1.** Patients' data and diagnosis.

| Case | Age | SEX | Diagnosis                                            |
|------|-----|-----|------------------------------------------------------|
| 1FA  | 55  | M   | Glioblastoma Grade IV CNS-<br>WHO2021, IDH wild type |
| 2CS  | 46  | F   | Glioblastoma Grade IV CNS-<br>WHO2021, IDH wild type |
| 3GG  | 65  | M   | Glioblastoma Grade IV CNS-<br>WHO2021, IDH wild type |
| 8SA  | 61  | F   | Glioblastoma Grade IV CNS-<br>WHO2021, IDH wild type |
| 9RN  | 49  | F   | Glioblastoma Grade IV CNS-<br>WHO2021, IDH wild type |
| 10FC | 57  | F   | Glioblastoma Grade IV CNS-<br>WHO2021, IDH wild type |
| 27FG | 61  | F   | Glioblastoma Grade IV CNS-<br>WHO2021, IDH wild type |
| 29MM | 63  | M   | Glioblastoma Grade IV CNS-<br>WHO2021, IDH wild type |
| 30LR | 49  | M   | Glioblastoma Grade IV CNS-<br>WHO2021, IDH wild type |

**Table S2.** Molecular data.

| Case | IDH1 mutation | ATRX<br>Mutation | TP53<br>expression | Ki67<br>% | GFAP     | EGFR overexpression |
|------|---------------|------------------|--------------------|-----------|----------|---------------------|
| 1FA  | No            | No               | Yes                | 40%       | Positive | Yes                 |
| 2CS  | No            | No               | Yes                | 30%       | Positive | Yes                 |
| 3GG  | No            | No               | Yes                | 20%       | Positive | Yes                 |
| 8SA  | No            | No               | Yes                | 15%       | Positive | Yes                 |
| 9RN  | No            | No               | Yes                | 20%       | Positive | Yes                 |
| 10FC | No            | No               | Yes                | 10%       | Positive | Yes                 |
| 27FG | No            | No               | Yes                | 15%       | Positive | Yes                 |
| 29MM | No            | No               | Yes                | 15%       | Positive | Yes                 |
| 30LR | No            | No               | Yes                | 40%       | Positive | Yes                 |

**Table S3.** Histological data.

| Case | HPF<br>Mitosis x/10 | Cellularity | Nuclei      | Neo-vascularization | Necrosis |
|------|---------------------|-------------|-------------|---------------------|----------|
| 1FA  | 8/10                | Higher      | Pleomorphic | Yes                 | Yes      |
| 2CS  | 7/10                | Higher      | Pleomorphic | Yes                 | Yes      |
| 3GG  | 6/10                | Higher      | Pleomorphic | Yes                 | Yes      |
| 8SA  | 4/10                | Higher      | Pleomorphic | Yes                 | Yes      |
| 9RN  | 8/10                | Higher      | Pleomorphic | Yes                 | Yes      |
| 10FC | 6/10                | Higher      | Pleomorphic | Yes                 | No       |
| 27FG | 6/10                | Higher      | Pleomorphic | Yes                 | Yes      |
| 29MM | 3/10                | Lower       | Pleomorphic | Yes                 | Yes      |
| 30LR | 3/10                | Lower       | Pleomorphic | Yes                 | Yes      |

**Table S4.** Morphological data from picture analysis and relation with Ki67 index.

| <b>Case</b> | <b>Ki67%</b> | <b>% of MsEVs</b> | <b>% of NCsM</b> | <b>% of MsLVs</b> |
|-------------|--------------|-------------------|------------------|-------------------|
| 1FA         | 40           | 27                | 3                | 16                |
| 2CS         | 30           | 25                | 18               | 9                 |
| 3GG         | 20           | 23                | 17               | 4                 |
| 8SA         | 15           | 14                | 16               | 2                 |
| 9RN         | 20           | 16                | 21               | 1                 |
| 10FC        | 10           | 12                | 19               | 1                 |
| 27FG        | 15           | 14                | 20               | 2                 |
| 29MM        | 15           | 12                | 15               | 1                 |
| 30LR        | 40           | 11                | 17               | 1                 |
